# Supplementary material for: Ultra-low charge transfer resistance carbons by one-pot hydrothermal method for glucose sensing
Source: Springer Nature journal article supplement (doi:10.1007/s40843-017-9104-9), 2017-10-13
Supplement: 40843_2017_9104_MOESM1_ESM.pdf [file 40843_2017_9104_MOESM1_ESM.pdf]

## Supporting information

### Ultra-low charge transfer resistance carbons by one-pot hydrothermal method for glucose sensing

Botao Hu<sup>1</sup>, Jen-Tsai Liu<sup>1\*</sup>, Chingjung Chen<sup>2\*</sup>, Zhan Zhao<sup>2,3</sup>, Shwu Jen Chang<sup>4</sup> and Pei-Leun Kang<sup>5</sup>

\* Corresponding author (email: jtliu@ucas.ac.cn (Liu J); cjchen@ucas.ac.cn (Chen C))

<sup>1</sup> College of Materials Science and Opti-Electronic Technology, University of Chinese Academy of Sciences, Beijing China

<sup>2</sup> School of Electronic, Electrical and Communication Engineering, University of Chinese Academy of Sciences, Beijing China

<sup>3</sup> State Key Lab of Transducer Technology, Institute of Electronics, Chinese Academy of Sciences, Beijing China

<sup>4</sup> Department of Electric Engineering, I-Shou University, Kaohsiung

<sup>5</sup> Cardiovascular Surgery, Department of Surgery, Kaohsiung Veterans General Hospital, Kaohsiung

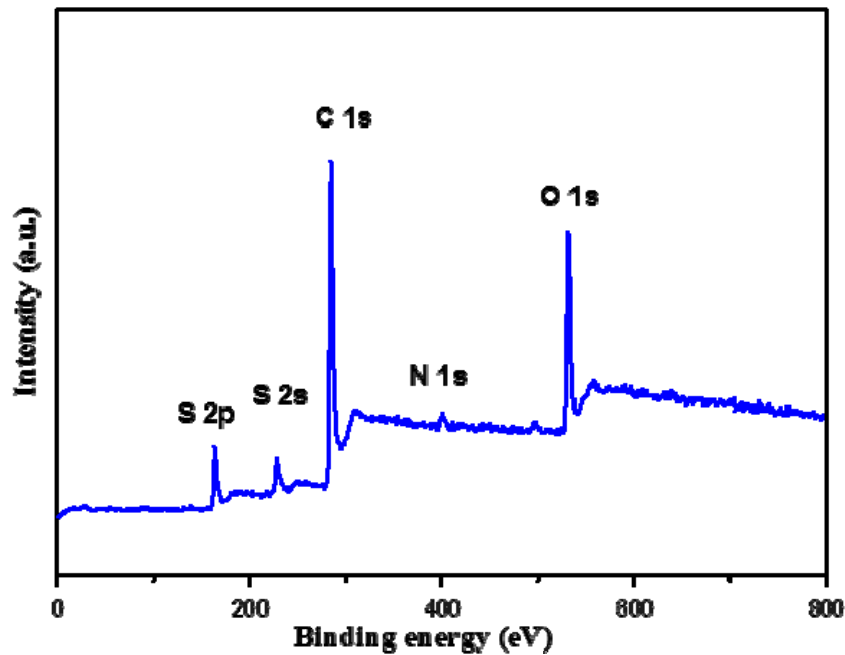

Figure S1 XPS spectrum survey scan of NS-C.

The high-resolution XPS spectrum is analyzed by program XPSPEAK. The high-resolution of N and S species doped in NS-C were measured 15 scans.
